# Supplementary material
Source: PubMed Central journal article supplement (PMC6714800)
Supplement: JVI.00758-19-s0001.pdf [file JVI.00758-19-s0001.pdf]

**Table S1.** Preliminary screening bioactive compounds that inhibit ZIKV infection in SNB-19 cells

| No. | Name                     | Target                  | Inhibition rate (%) | Brief introduction                                                                                                                                                                              |
|-----|--------------------------|-------------------------|---------------------|-------------------------------------------------------------------------------------------------------------------------------------------------------------------------------------------------|
| 1   | Pazopanib HCl            | VEGFR, PDGFR, c-Kit     | 95                  | Pazopanib (GW786034) is a novel multi-target inhibitor of VEGFR1, VEGFR2, VEGFR3, PDGFR, FGFR, c-Kit and c-Fms with IC50 of 10 nM, 30 nM, 47 nM, 84 nM, 74 nM, 140 nM and 146 nM, respectively. |
| 2   | Axitinib                 | VEGFR, PDGFR, c-Kit     | 95                  | Axitinib is a multi-target inhibitor of VEGFR1, VEGFR2, VEGFR3, PDGFR $\beta$ and c-Kit with IC50 of 0.1 nM, 0.2 nM, 0.1-0.3 nM, 1.6 nM and 1.7 nM, respectively.                               |
| 3   | Plinabulin (NPI-2358)    | VDA                     | 95                  | Plinabulin (NPI-2358) is a <b>vascular disrupting agent (VDA)</b> against tubulin-depolymerizing with <b>IC50</b> of 9.8~18 nM in tumor cells. Phase 1/2.                                       |
| 4   | Mitoxantrone             | Topoisomerase           | 95                  | Mitoxantrone is a type II topoisomerase inhibitor with IC50 of 2.0 $\mu$ M, 0.42 mM for HepG2 and MCF-7/wt cells, respectively                                                                  |
| 5   | Doxorubicin (Adriamycin) | Topoisomerase           | 95                  | Doxorubicin (Adriamycin) is an antibiotic agent that inhibits DNA topoisomerase II and induces DNA damage and apoptosis.                                                                        |
| 6   | Epirubicin HCl           | Topoisomerase           | 95                  | Epirubicin HCl, a semisynthetic L-arabino derivative of doxorubicin, is an antineoplastic agent by inhibiting Topoisomerase.                                                                    |
| 7   | Beta-Lapachone           | Topoisomerase           | 95                  | Beta-Lapachone is a selective DNA topoisomerase I inhibitor, exhibiting no inhibitory activities against DNA topoisomerase II or ligase. Phase 2.                                               |
| 8   | Pirarubicin              | Topoisomerase           | 95                  | Pirarubicin is an anthracycline antibiotic, and also a DNA/RNA synthesis inhibitor by intercalating into DNA and interacts with topoisomerase II, used as an antineoplastic agent.              |
| 9   | Fludarabine              | STAT, DNA/RNA Synthesis | 95                  | Fludarabine is a <b>STAT1</b> activation inhibitor and a <b>DNA</b> synthesis inhibitor in Vascular smooth muscle cells.                                                                        |
| 10  | Cryptotanshinone         | STAT                    | 95                  | Cryptotanshinone (CPT) is a STAT3 inhibitor with IC50 of 4.6 $\mu$ M, strongly inhibits phosphorylation of STAT3 Tyr705, with a small effect on STAT3 Ser727, but none against STAT1 nor STAT5. |
| 11  | Saracatinib (AZD0530)    | Src, Bcr-Abl            | 95                  | Saracatinib (AZD0530) is a potent Src inhibitor with IC50 of 2.7 nM, and potent to c-Yes, Fyn, Lyn, Blk, Fgr and Lck; less active for Abl and EGFR (L858R and L861Q). Phase 1/2.                |
| 12  | Bosutinib (SKI-606)      | Src                     | 95                  | Bosutinib (SKI-606) is a novel, dual Src/Abl inhibitor with IC50 of 1.2 nM and 1 nM, respectively.                                                                                              |
| 13  | Ouabain                  | Sodium Channel          | 95                  | Ouabain is a selective Na <sup>+</sup> /K <sup>+</sup> , -ATPase inhibitor, binds to $\alpha$ 2/ $\alpha$ 3 subunit with Ki of 41 nM/15 nM.                                                     |
| 14  | Sorafenib                | Raf                     | 95                  | Sorafenib is a multikinase inhibitor of Raf-1, B-Raf and VEGFR-2 with IC50 of 6 nM, 22 nM and 90 nM, respectively.                                                                              |

|    |                        |                          |    |                                                                                                                                                                                                                                                                                                                                                              |
|----|------------------------|--------------------------|----|--------------------------------------------------------------------------------------------------------------------------------------------------------------------------------------------------------------------------------------------------------------------------------------------------------------------------------------------------------------|
| 15 | Pantoprazole sodium    | Proton Pump              | 95 | Pantoprazole is a proton pump inhibitor drug that inhibits gastric acid secretion. It works on gastric parietal cells to irreversibly inhibit (H <sup>+</sup> /K <sup>+</sup> )-ATPase function and suppress the production of gastric acid.                                                                                                                 |
| 16 | Zinc Pyrithione        | Proton Pump              | 95 | Zinc pyrithione is an antifungal and antibacterial agent disrupting membrane transport by blocking the proton pump.                                                                                                                                                                                                                                          |
| 17 | Esomeprazole Magnesium | Proton Pump              | 95 | Esomeprazole Magnesium is a proton pump inhibitor to reduce gastric acid secretion.                                                                                                                                                                                                                                                                          |
| 18 | Danoprevir (ITMN-191)  | Proteasome, HCV Protease | 95 | Danoprevir (ITMN-191) is a peptidomimetic inhibitor of the NS3/4A protease of hepatitis C virus (HCV) with IC <sub>50</sub> of 0.2-3.5 nM, inhibition effect for HCV genotypes 1A/1B/4/5/6 is ~10-fold higher than 2B/3A. Phase 2.                                                                                                                           |
| 19 | CEP-18770 (Delanzomib) | Proteasome               | 95 | CEP-18770 is an orally active inhibitor of the chymotrypsin-like activity of proteasome with IC <sub>50</sub> of 3.8 nM, with only marginal inhibition of the tryptic and peptidylglutamyl activities of the proteasome. Phase 1/2.                                                                                                                          |
| 20 | Carfilzomib (PR-171)   | Proteasome               | 95 | Carfilzomib (PR-171) is an irreversible proteasome inhibitor with IC <sub>50</sub> of <5 nM, displayed preferential in vitro inhibitory potency against the ChT-L activity in the β <sub>5</sub> subunit, but little or no effect on the PGPH and T-L activities.                                                                                            |
| 21 | Epoxomicin             | Proteasome               | 95 | Epoxomicin is a selective proteasome inhibitor with anti-inflammatory activity, inhibits primarily the CH-L activity of the 20S proteasome, while T-L and PGPH catalytic activities are also inhibited at 100- and 1000-fold reduced rate.                                                                                                                   |
| 22 | MG-132                 | Proteasome               | 95 | MG-132 is an inhibitor of proteasome with IC <sub>50</sub> of 100 nM, and also inhibits calpain with IC <sub>50</sub> of 1.2 μM.                                                                                                                                                                                                                             |
| 23 | ONX-0914 (PR-957)      | Proteasome               | 95 | ONX-0914 (PR-957) is a potent and selective immunoproteasome inhibitor with minimal cross-reactivity for the constitutive proteasome.                                                                                                                                                                                                                        |
| 24 | MLN2238                | Proteasome               | 95 | MLN2238 inhibits the chymotrypsin-like proteolytic (β <sub>5</sub> ) site of the 20S proteasome with IC <sub>50</sub> and K <sub>i</sub> of 3.4 nM and 0.93 nM, respectively, also inhibits the caspase-like (β <sub>1</sub> ) and trypsin-like (β <sub>2</sub> ) proteolytic sites, with IC <sub>50</sub> of 31 and 3500 nM.                                |
| 25 | MLN9708                | Proteasome               | 95 | MLN9708 immediately hydrolyzed to MLN2238, the biologically active form, on exposure to aqueous solutions or plasma. MLN2238 inhibits the chymotrypsin-like proteolytic (β <sub>5</sub> ) site of the 20S proteasome with IC <sub>50</sub> /K <sub>i</sub> of 3.4 nM/0.93 nM, less potent to β <sub>1</sub> and little activity to β <sub>2</sub> . Phase 3. |
| 26 | Hexachlorophene        | potassium channel        | 95 | Hexachlorophene is a potent KCNQ1/KCNE1 potassium channel activator with EC <sub>50</sub> of 4.61 ± 1.29 μM; It can also attenuate Wnt/beta-catenin signaling through the Siah-1-mediated beta-catenin degradation.                                                                                                                                          |
| 27 | PIK-75                 | PI3K, DNA-PK             | 95 | PIK-75 is a p110α inhibitor with IC <sub>50</sub> of 5.8 nM (200-fold more potently than p110β), isoform-specific mutants at Ser773, and                                                                                                                                                                                                                     |

|    |                                      |        |    |                                                                                                                                                                                                                      |
|----|--------------------------------------|--------|----|----------------------------------------------------------------------------------------------------------------------------------------------------------------------------------------------------------------------|
|    |                                      |        |    | also potently inhibits DNA-PK with IC50 of 2 nM.                                                                                                                                                                     |
| 28 | Veliparib<br>(ABT-888)               | PARP   | 95 | Veliparib (ABT-888) is a potent inhibitor of PARP1 and PARP2 with Ki of 5.2 nM and 2.9 nM, respectively. It is inactive to SIRT2. Phase 1/2.                                                                         |
| 29 | Rucaparib<br>(AG-014699,PF-01367338) | PARP   | 95 | Rucaparib (AG-014699, PF-01367338) is an inhibitor of PARP with Ki of 1.4 nM for PARP1, also showing binding affinity to eight other PARP domains. Phase 1/2.                                                        |
| 30 | Tenovin-1                            | p53    | 95 | Tenovin-1 protects against MDM2-mediated p53 degradation, which involves ubiquitination, and acts through inhibition of protein-deacetylating activities of SirT1 and SirT2.                                         |
| 31 | Baicalein                            | P450   | 95 | Baicalein is a CYP2C9 and prolyl endopeptidase inhibitor.                                                                                                                                                            |
| 32 | Avasimibe                            | P450   | 95 | Avasimibe inhibits ACAT with IC50 of 3.3 μM, also inhibits human P450 isoenzymes CYP2C9, CYP1A2 and CYP2C19 with IC50 of 2.9 μM, 13.9 μM and 26.5 μM,                                                                |
| 33 | Gambogic<br>Acid                     | Others | 95 | Gambogic Acid activates caspases with EC50 of 0.78-1.64 μM and competitively inhibits Bcl-X <sub>L</sub> , Bcl-2, Bcl-W, Bcl-B, Bfl-1 and Mcl-1 with IC50 of 1.47, 1.21, 2.02, 0.66, 1.06 and 0.79 μM, respectively. |
| 34 | Gemcitabine                          | Others | 95 | Gemcitabine(Gemzar) belongs to the group of medicines called antimetabolites.Phase 3.                                                                                                                                |
| 35 | Telmisartan                          | Others | 95 | Telmisartan (Micardis) is an angiotensin II receptor antagonist (ARB) used in the management of hypertension.                                                                                                        |
| 36 | Mycophenolate<br>Mofetil             | Others | 95 | Mycophenolate Mofetil is a non-competitive, selective and reversible inhibitor of inosine monophosphate dehydrogenase I/II with IC50 of 39 nM and 27 nM, respectively.                                               |
| 37 | Nevirapine                           | Others | 95 | Nevirapine(Viramune) is a non-nucleoside reverse transcriptase inhibitor (NNRTI) used to treat HIV-1 infection and AIDS.                                                                                             |
| 38 | Domiphen<br>Bromide                  | Others | 95 | Domiphen bromide is a quaternary ammonium antiseptic with actions as a cationic surfactant.                                                                                                                          |
| 39 | Mitoxantrone<br>HCl                  | Others | 95 | Mitoxantrone HCl is a classic folic acid antagonist.                                                                                                                                                                 |
| 40 | Halofuginone                         | Others | 95 | Halofuginone is the competitively inhibitor of prolyl-tRNA synthetase with Ki of 18.3 nM.It could also down-regulate Smad3 and blocked TGF-β signaling at 10 ng/ml in mammal.                                        |
| 41 | Teniposide                           | Others | 95 | Teniposide(Vumon)is a chemotherapeutic medication mainly used in the treatment of childhood acute lymphocytic leukemia (ALL).                                                                                        |
| 42 | Adapalene                            | Others | 95 | Adapalene is a third-generation topical retinoid primarily used in the treatment of acne.                                                                                                                            |
| 43 | Cetylpyridinium<br>Chloride          | Others | 95 | Cetylpyridinium chloride is a cationic quaternary ammonium compound used as oropharyngeal antiseptic.                                                                                                                |
| 44 | NH125                                | Others | 95 | NH125 is a selective eEF-2 kinase inhibitor with IC50 of 60                                                                                                                                                          |

|    |                                         |        |    |                                                                                                                                                                                                                               |
|----|-----------------------------------------|--------|----|-------------------------------------------------------------------------------------------------------------------------------------------------------------------------------------------------------------------------------|
|    |                                         |        |    | nM, >125-fold selectivity over PKC, PKA, and CaMKII, and also a potent histidine kinase inhibitor.                                                                                                                            |
| 45 | Mycophenolic acid                       | Others | 95 | Mycophenolic acid is an immunosuppressant agent used to prevent rejection in organ transplantation.                                                                                                                           |
| 46 | AI-10-49                                | Others | 95 | AI-10-49 is a selective inhibitor of the binding of CBF $\beta$ -SMMHC to RUNX1 with IC50 of 260 nM.                                                                                                                          |
| 47 | PTC-209                                 | Others | 95 | PTC-209 is a potent and selective BMI-1 inhibitor with IC50 of 0.5 $\mu$ M, and results in irreversible reduction of cancer-initiating cells (CICs).                                                                          |
| 48 | MK-886 (L-663,536)                      | others | 95 | MK-886 is an inhibitor of leukotriene biosynthesis, inhibiting 5-lipoxygenase-activating protein (FLAP). It is also a moderately potent PPAR $\alpha$ antagonist.                                                             |
| 49 | Dp44mT                                  | Others | 95 | Dp44mT is a potent iron chelator, which shows selective antitumor activity.                                                                                                                                                   |
| 50 | Ethacridine lactate monohydrate         | Others | 95 | Ethacridine lactate monohydrate is an aromatic organic compound based on acridine used as an antiseptic agent.                                                                                                                |
| 51 | Crystal Violet                          | Others | 95 | Crystal violet is a triarylmethane dye.                                                                                                                                                                                       |
| 52 | Methylene Blue                          | others | 95 | Methylene Blue is used as a dye in chromoendoscopy. It inhibits tau filament formation with IC50 of 1.9 $\mu$ M. Also it inhibits soluble guanylyl cyclase.                                                                   |
| 53 | Dapsone                                 | others | 95 | Dapsone, also known as diaminodiphenyl sulfone (DDS), is an antibiotic commonly used in combination with rifampicin and clofazimine for the treatment of leprosy.                                                             |
| 54 | Prednisolone                            | Others | 95 | Prednisolone(Hydroretrocortine) is a synthetic glucocorticoid with anti-inflammatory and immunomodulating properties.                                                                                                         |
| 55 | i-Inositol                              | others | 95 | i-Inositol, also known as myo-inositol, is a chemical compound which is sugar alcohol. i-Inositol is involved in a number of biological processes including insulin signal transduction, cytoskeleton transduction and so on. |
| 56 | Thiabendazole                           | Others | 95 | Thiabendazole inhibites the mitochondrial helminth-specific enzyme, fumarate reductase, with anthelmintic property.                                                                                                           |
| 57 | Rifabutin                               | Others | 95 | Rifabutin(Mycobutin) is a semisynthetic ansamycin antibiotic with potent antimycobacterial properties.                                                                                                                        |
| 58 | TRx 0237 (LMTX <sup>TM</sup> ) mesylate | others | 95 | TRx 0237 (LMTX <sup>TM</sup> ) mesylate is a second-generation tau protein aggregation inhibitor for the treatment of Alzheimer's disease (AD) and frontotemporal dementia.                                                   |
| 59 | Guaifenesin                             | Others | 95 | Guaifenesin(Guaiphenesin) is thought to act as an expectorant.                                                                                                                                                                |
| 60 | Nicotinic Acid                          | Others | 95 | Nicotinic Acid is a water-soluble vitamin belonging to the vitamin B family.                                                                                                                                                  |
| 61 | Ropivacaine HCl                         | Others | 95 | Ropivacaine HCl is an anaesthetic agent and blocks impulse conduction in nerve fibres through inhibiting sodium ion influx                                                                                                    |

|    |                                    |                  |    |                                                                                                                                                                             |
|----|------------------------------------|------------------|----|-----------------------------------------------------------------------------------------------------------------------------------------------------------------------------|
|    |                                    |                  |    | reversibly.                                                                                                                                                                 |
| 62 | Triptolide (PG490)                 | Others           | 95 | Triptolide is a diterpene triepoxide, immunosuppressive agent extracted from the Chinese herb <i>Tripterygium wilfordii</i> .                                               |
| 63 | Iopamidol                          | others           | 95 | Iopamidol is a non-ionic, water-soluble radiographic contrast agent.                                                                                                        |
| 64 | Triclosan                          | others           | 95 | Triclosan is a diphenyl ether derivative used in cosmetics and toilet soaps as an antiseptic. It has some bacteriostatic and fungistatic action.                            |
| 65 | Nitrofurantoin                     | others           | 95 | Nitrofurantoin is an antibiotic used to treat bladder infections. It inhibits bacterial DNA, RNA, and cell wall protein synthesis.                                          |
| 66 | JTC-801                            | Opioid Receptor  | 95 | JTC-801 is a selective opioid receptor-like1 (ORL1) receptor antagonist with IC50 of 94 nM, weakly inhibits receptors $\delta$ , $\kappa$ , and $\mu$ .                     |
| 67 | Rapamycin (Sirolimus)              | mTOR             | 95 | Rapamycin (Sirolimus, AY-22989, WY-090217) is a specific mTOR inhibitor with IC50 of $\sim$ 0.1 nM.                                                                         |
| 68 | Temsirolimus (CCI-779, NSC 683864) | mTOR             | 95 | Temsirolimus (CCI-779) is a specific mTOR inhibitor with IC50 of 1.76 $\mu$ M.                                                                                              |
| 69 | IMD 0354                           | IKK              | 95 | IMD-0354 is an IKK $\beta$ inhibitor and blocks I $\kappa$ B $\alpha$ phosphorylation in NF- $\kappa$ B pathway.                                                            |
| 70 | VER-50589                          | HSP (e.g. HSP90) | 95 | VER-50589 is a potent HSP90 inhibitor with IC50 of 21 nM for HSP90 $\beta$ .                                                                                                |
| 71 | BIIB021                            | HSP              | 95 | BIIB021 is an orally available, fully synthetic small-molecule inhibitor of HSP90 with Ki and EC50 of 1.7 nM and 38 nM, respectively.                                       |
| 72 | VER-49009                          | HSP              | 95 | VER-49009 is a potent HSP90 inhibitor with IC50 of 47 nM for HSP90 $\beta$ .                                                                                                |
| 73 | Ganetespib (STA-9090)              | HSP              | 95 | Ganetespib is an HSP90 inhibitor with IC50 of 4 nM in OSA 8 cells, induces apoptosis of OSA cells while normal osteoblasts are not affected; active metabolite of STA-1474. |
| 74 | 17-AAG (Tanespimycin)              | HSP              | 95 | 17-AAG is a potent HSP90 inhibitor with IC50 of 5 nM, having a 100-fold higher binding affinity for HSP90 derived from tumour cells than HSP90 from normal cells.           |
| 75 | 17-DMAG (Alvespimycin) HCl         | HSP              | 95 | 17-DMAG is a potent, water-soluble HSP90 inhibitor with IC50 of 62 nM.                                                                                                      |
| 76 | CUDC-907                           | HDAC, PI3K       | 95 | CUDC-907 is a dual PI3K and HDAC inhibitor for PI3K $\alpha$ and HDAC1/2/3/10 with IC50 of 19 nM and 1.7 nM/5 nM/1.8 nM/2.8 nM, respectively. Phase 1.                      |
| 77 | Givinostat (ITF2357)               | HDAC             | 95 | Givinostat (ITF2357) is a potent HDAC inhibitor for HDAC2, HDAC1B and HDAC1A with IC50 of 10 nM, 7.5 nM and 16 nM. Phase 1/2.                                               |
| 78 | CAY10603                           | HDAC             | 95 | CAY10603 is a potent and selective HDAC6 inhibitor                                                                                                                          |

|    |                                        |                       |    |                                                                                                                                                                                                         |
|----|----------------------------------------|-----------------------|----|---------------------------------------------------------------------------------------------------------------------------------------------------------------------------------------------------------|
|    |                                        |                       |    | with <b>IC<sub>50</sub></b> of 2 pM, >200-fold selectivity over other HDACs.                                                                                                                            |
| 79 | Lapatinib<br>(GW-572016)<br>Ditosylate | EGFR, HER2            | 95 | Lapatinib Ditosylate (GW572016, GW2016) is a potent EGFR and ErbB2 inhibitor with IC <sub>50</sub> of 10.8 and 9.2 nM, respectively.                                                                    |
| 80 | AZD3759                                | EGFR                  | 95 | AZD3759 is a potent, oral active, CNS-penetrant EGFR inhibitor with IC <sub>50</sub> of 0.3 nM, 0.2 nM, and 0.2 nM for EGFR (WT), EGFR (L858R), and EGFR (exon 19Del), respectively. Phase 1.           |
| 81 | Tyrphostin 9                           | EGFR                  | 95 | Tyrphostin 9 is firstly designed as an EGFR inhibitor with IC <sub>50</sub> of 460 μM, but is also found to be more potent to PDGFR with IC <sub>50</sub> of 0.5 μM.                                    |
| 82 | PR-619                                 | DUB                   | 95 | PR-619 is a non-selective, reversible inhibitor of the deubiquitinating enzymes (DUBs) with EC <sub>50</sub> of 1-20 μM.                                                                                |
| 83 | PP121                                  | DNA-PK,<br>mTOR, PDGF | 95 | PP-121 is a multi-targeted inhibitor of PDGFR, Hck, mTOR, VEGFR2, Src and Abl with IC <sub>50</sub> of 2 nM, 8 nM, 10 nM, 12 nM, 14 nM and 18 nM, also inhibits DNA-PK with IC <sub>50</sub> of 60 nM.  |
| 84 | Fludarabine<br>Phosphate               | DNA/RNA<br>Synthesis  | 95 | Fludarabine Phosphate is an analogue of adenosine and deoxyadenosine, which is able to compete with dATP for incorporation into DNA and inhibit DNA synthesis.                                          |
| 85 | Clofarabine                            | DNA/RNA<br>Synthesis  | 95 | Clofarabine inhibits the enzymatic activities of ribonucleotide reductase (IC <sub>50</sub> = 65 nM) and DNA polymerase.                                                                                |
| 86 | MG-101<br>(ALLN)                       | Cysteine<br>Protease  | 95 | MG-101 (ALLN) is a cell-permeable and potent inhibitor of <b>cysteine proteases</b> including calpains and lysosomal cathepsins.                                                                        |
| 87 | Salicylic acid                         | COX                   | 95 | Salicylic acid is a beta hydroxy acid that occurs as a natural compound in plants which is an inhibitor of ethylene biosynthesis and cyclooxygenase activity.                                           |
| 88 | BMS-794833                             | c-Met, VEGFR          | 95 | BMS-794833 is a potent ATP competitive inhibitor of Met/VEGFR2 with IC <sub>50</sub> of 1.7 nM/15 nM, also inhibits Ron, Axl and Flt3 with IC <sub>50</sub> of <3 nM; a prodrug of BMS-817378. Phase 1. |
| 89 | AZD7762                                | Chk                   | 95 | AZD7762 is a potent and selective inhibitor of Chk1 with IC <sub>50</sub> of 5 nM. It is equally potent against Chk2 and less potent against CAM, Yes, Fyn, Lyn, Hck and Lck. Phase 1.                  |
| 90 | R547                                   | CDK                   | 95 | R547 is a potent ATP-competitive inhibitor of CDK1/2/4 with Ki of 2 nM/3 nM/1 nM. It is less potent to CDK7 and GSK3α/β, while inactive to other kinases.                                               |
| 91 | AT7519                                 | CDK                   | 95 | AT7519 is a multi-CDK inhibitor for CDK1, 2, 4, 6 and 9 with IC <sub>50</sub> of 10-210 nM. It is less potent to CDK3 and little active to CDK7. Phase 1.                                               |
| 92 | Flavopiridol<br>HCl                    | CDK                   | 95 | Flavopiridol competes with ATP to inhibit CDKs including CDK1, CDK2, CDK4 and CDK6 with IC <sub>50</sub> of ~ 40 nM. It is 7.5-fold more selective for CDK1/2/4/6 than CDK7. Flavopiridol               |

|     |                                  |                                        |    |                                                                                                                                                                                                                                                                      |
|-----|----------------------------------|----------------------------------------|----|----------------------------------------------------------------------------------------------------------------------------------------------------------------------------------------------------------------------------------------------------------------------|
| 93  | Dinaciclib<br>(SCH727965)        | CDK                                    | 95 | is initially found to inhibit EGFR and PKA. Phase 1/2.<br>Dinaciclib (SCH727965) is a novel and potent CDK inhibitor for CDK2, CDK5, CDK1 and CDK9 with IC50 of 1 nM, 1 nM, 3 nM and 4 nM, respectively. It also blocks thymidine (dThd) DNA incorporation. Phase 3. |
| 94  | AZD5438                          | CDK                                    | 95 | AZD5438 is a potent inhibitor of CDK1/2/9 with IC50 of 16 nM/6 nM/20 nM. It is less potent to CDK5/6 and also inhibits GSK3 $\beta$ . Phase 1.                                                                                                                       |
| 95  | SNS-032<br>(BMS-387032)          | CDK                                    | 95 | SNS-032 has firstly been described as a selective inhibitor of CDK2 with IC50 of 48 nM and is 10- and 20-fold selective over CDK1/CDK4. It is also found to be sensitive to CDK7/9 with IC50 of 62 nM/4 nM, with little effect on CDK6. Phase 1.                     |
| 96  | Lercanidipine<br>(hydrochloride) | Calcium<br>Channel                     | 95 | Lercanidipine is a calcium channel blocker of the dihydropyridine class.                                                                                                                                                                                             |
| 97  | Ponatinib<br>(AP24534)           | Bcr-Abl,<br>VEGFR, FGFR,<br>PDGFR, Flt | 95 | Ponatinib (AP24534) is a novel, potent multi-target inhibitor of Abl, PDGFR $\alpha$ , VEGFR2, FGFR1 and Src with IC50 of 0.37 nM, 1.1 nM, 1.5 nM, 2.2 nM and 5.4 nM, respectively.                                                                                  |
| 98  | DCC-2036<br>(Rebastinib)         | Bcr-Abl                                | 95 | DCC-2036 is a conformational control Bcr-Abl inhibitor for Abl1(WT) and Abl1(T315I) with IC50 of 0.8 nM and 4 nM, also inhibits SRC, LYN, FGR, HCK, KDR, FLT3, and Tie-2, and low activity to seen towards c-Kit. Phase 1/2.                                         |
| 99  | AT101                            | Bcl-2                                  | 95 | AT101, the R-(-) enantiomer of Gossypol acetic acid, binds with Bcl-2, Bcl-xL and Mcl-1 with Ki of 0.32 $\mu$ M, 0.48 $\mu$ M and 0.18 $\mu$ M; does not inhibit BIR3 domain and BID. Phase 1/2.                                                                     |
| 100 | ABT-199<br>(GDC-0199)            | Bcl-2                                  | 95 | ABT-199 (GDC-0199) is a Bcl-2-selective inhibitor with Ki of <0.01 nM, >4800-fold more selective versus Bcl-xL and Bcl-w, and no activity to Mcl-1. Phase 2.                                                                                                         |
| 101 | Alisertib<br>(MLN8237)           | Aurora Kinase                          | 95 | Alisertib (MLN8237) is a selective Aurora A inhibitor with IC50 of 1.2 nM. It has >200-fold higher selectivity for Aurora A than Aurora B. Phase 3.                                                                                                                  |
| 102 | FCCP                             | ATPase                                 | 95 | FCCP is a potent uncoupler of oxidative phosphorylation in mitochondria that disrupts ATP synthesis by transporting protons across cell membranes.                                                                                                                   |
| 103 | CGK 733                          | ATM/ATR                                | 95 | CGK 733 is a potent and selective inhibitor of ATM/ATR with IC50 of ~200 nM.                                                                                                                                                                                         |
| 104 | MK-2866<br>(GTx-024)             | Androgen<br>Receptor                   | 95 | MK-2866 (GTx-024) is a selective androgen receptor modulator (SARM) with Ki of 3.8 nM, and is tissue-selective for anabolic organs. Phase 3.                                                                                                                         |
| 105 | GSK690693                        | Akt                                    | 95 | GSK690693 is a pan-Akt inhibitor targeting Akt1/2/3 with IC50 of 2 nM/13 nM/9 nM, also sensitive to the AGC kinase family: PKA, PrkX and PKC isozymes. Phase 1.                                                                                                      |
| 106 | Formoterol<br>Hemifumarate       | Adrenergic<br>Receptor                 | 95 | Formoterol hemifumarate is a potent, selective and long-acting $\beta$ 2-adrenoceptor agonist to $\beta$ 2 and $\beta$ 1 receptors with pKd of                                                                                                                       |

|     |                               |                              |    |                                                                                                                                                                                                                                                                        |
|-----|-------------------------------|------------------------------|----|------------------------------------------------------------------------------------------------------------------------------------------------------------------------------------------------------------------------------------------------------------------------|
|     |                               |                              |    | 8.12 and 5.58, respectively.                                                                                                                                                                                                                                           |
| 107 | Trihexyphenidyl hydrochloride | AChR                         | 95 | Trihexyphenidyl hydrochloride is an antiparkinsonian agent of the antimuscarinic class.                                                                                                                                                                                |
| 108 | Prucalopride                  | 5-HT Receptor                | 95 | Prucalopride is a selective, high affinity 5-HT receptor agonist for 5-HT <sub>4A</sub> and 5-HT <sub>4B</sub> receptor with K <sub>i</sub> of 2.5 nM and 8 nM, respectively, exhibits >290-fold selectivity against other 5-HT receptor subtypes. Phase 3.            |
| 109 | Sodium Monofluorophosphate    | Akt                          | 95 | Perifosine (KRX-0401) is a novel Akt inhibitor with IC <sub>50</sub> of 4.7 μM in MM.1S cells, targets pleckstrin homology domain of Akt. Phase 3.                                                                                                                     |
| 110 | Mizoribine                    | Others                       | 95 | Proflavine Hemisulfate is a topical antiseptic by interchelating DNA, thereby disrupting DNA synthesis and leading to high levels of mutation in the copied DNA strands.                                                                                               |
| 111 | Bivalirudin Trifluoroacetate  | Autophagy, DNA/RNA Synthesis | 95 | Gemcitabine HCl is a DNA synthesis inhibitor with IC <sub>50</sub> of 50 nM, 40 nM, 18 nM and 12 nM in PANC1, MIAPaCa2, BxPC3 and Capan2 cells, respectively.                                                                                                          |
| 112 | PD0166285                     | Wee1/Chk1                    | 90 | PD0166285 is a potent Wee1 and Chk1 inhibitor with activity at nanomolar concentrations. PD0166285 is a novel G2 checkpoint abrogator.                                                                                                                                 |
| 113 | NVP-BHG712                    | VEGFR, Src, Raf, Bcr-Abl     | 90 | NVP-BHG712 is a specific EphB4 inhibitor with ED <sub>50</sub> of 25 nM that discriminates between VEGFR and EphB4 inhibition; also shows activity against c-Raf, c-Src and c-Abl with IC <sub>50</sub> of 0.395 μM, 1.266 μM and 1.667 μM, respectively.              |
| 114 | (S)-10-Hydroxycamptothecin    | Topoisomerase                | 90 | 10-Hydroxycamptothecin is a DNA topoisomerase I inhibitor with potent anti-tumor activity.                                                                                                                                                                             |
| 115 | SU6656                        | Src                          | 90 | SU 6656 is a selective Src family kinase inhibitor with IC <sub>50</sub> of 280 nM, 20 nM, 130 nM, and 170 nM for Src, Yes, Lyn, and Fyn, respectively.                                                                                                                |
| 116 | Vinpocetine                   | Sodium Channel               | 90 | Vinpocetine is a selective inhibitor of voltage-sensitive sodium channel for the treatment of stroke, vascular dementia and Alzheimer's disease.                                                                                                                       |
| 117 | SGI-1776 free base            | Pim                          | 90 | SGI-1776 is a novel ATP competitive inhibitor of Pim1 with IC <sub>50</sub> of 7 nM, 50- and 10-fold selective versus Pim2 and Pim3, also potent to Flt3 and haspin. Phase 1.                                                                                          |
| 118 | GNE-317                       | PI3K                         | 90 | GNE-317 is a potent, brain-penetrant PI3K inhibitor.                                                                                                                                                                                                                   |
| 119 | Linifanib (ABT-869)           | PDGFR, VEGFR                 | 90 | Linifanib (ABT-869) is a novel, potent ATP-competitive VEGFR/PDGFR inhibitor for KDR, CSF-1R, Flt-1/3 and PDGFRβ with IC <sub>50</sub> of 4 nM, 3 nM, 3 nM/4 nM and 66 nM respectively, mostly effective in mutant kinase-dependent cancer cells (i.e. FLT3). Phase 3. |
| 120 | Olaparib (AZD2281,            | PARP                         | 90 | Olaparib (AZD2281, KU0059436) is a selective inhibitor of PARP1/2 with IC <sub>50</sub> of 5 nM/1 nM, 300-times less effective                                                                                                                                         |



|     |                                      |                        |    |                                                                                                                                                                                                                                                       |
|-----|--------------------------------------|------------------------|----|-------------------------------------------------------------------------------------------------------------------------------------------------------------------------------------------------------------------------------------------------------|
|     | Ku-0059436)                          |                        |    | against tankyrase-1. Phase 1/2.                                                                                                                                                                                                                       |
| 121 | NSC348884                            | p53                    | 90 | NSC348884, as a nucleophosmin inhibitor, inhibit cell proliferation and induce apoptosis in various cancer cell lines with IC50 values ranging from 1.4-4 μM                                                                                          |
| 122 | Cetrimonium Bromide (CTAB)           | Others                 | 90 | Cetrimonium Bromide is a known component of the broad-spectrum antiseptic cetrimide, which is a mixture of different quaternary ammonium salts.                                                                                                       |
| 123 | Altretamine                          | Others                 | 90 | Altretamine is an anti-neoplastic agent.                                                                                                                                                                                                              |
| 124 | 4E1RCat                              | Others                 | 90 | 4E1RCat is a dual inhibitor of eIF4E:eIF4G and eIF4E:4E-BP1 interaction, and inhibits the binding of eIF4G to eIF4E with IC50 of 3.2 μM.                                                                                                              |
| 125 | Ridaforolimus (Deforolimus, MK-8669) | mTOR                   | 90 | Ridaforolimus (Deforolimus, MK-8669) is a selective mTOR inhibitor with IC50 of 0.2 nM in HT-1080 cell line; while not classified as a prodrug, mTOR inhibition and FKBP12 binding is similar to rapamycin. Phase 3.                                  |
| 126 | CC-223                               | mTOR                   | 90 | CC-223 is a potent, selective, and orally bioavailable mTOR inhibitor with IC50 of 16 nM, >200-fold selectivity over the related PI3K-α. Phase 1/2.                                                                                                   |
| 127 | Combretastatin A4                    | Microtubule Associated | 90 | Combretastatin A4 is a microtubule-targeting agent that binds β-tubulin with K <sub>d</sub> of 0.4 μM. Phase 3.                                                                                                                                       |
| 128 | FLLL32                               | JAK                    | 90 | FLLL32 is a potent JAK2/STAT3 inhibitor with IC50 of <5 μM.                                                                                                                                                                                           |
| 129 | Elvitegravir (GS-9137, JTK-303)      | Integrase              | 90 | Elvitegravir (EVG, JTK-303/GS-9137) is an HIV integrase inhibitor for HIV-1 IIIB, HIV-2 EHO and HIV-2 ROD with IC50 of 0.7 nM, 2.8 nM and 1.4 nM, respectively.                                                                                       |
| 130 | SNX-2112 (PF-04928473)               | HSP                    | 90 | SNX-2112 selectively binds to the ATP pocket of HSP90α and HSP90β with K <sub>a</sub> of 30 nM and 30 nM, uniformly more potent than 17-AAG.                                                                                                          |
| 131 | AT13387                              | HSP                    | 90 | AT13387 is a selective potent Hsp90 inhibitor with IC50 of 18 nM in A375 cells, displays a long duration of anti-tumor activity.                                                                                                                      |
| 132 | GSK1292263                           | GPR                    | 90 | GSK1292263 is a novel GPR119 agonist, showing potential for the treatment of type 2 diabetes. Phase 2.                                                                                                                                                |
| 133 | Erlotinib HCl (OSI-744)              | EGFR                   | 90 | Erlotinib HCl (OSI-744) is an EGFR inhibitor with IC50 of 2 nM, >1000-fold more sensitive for EGFR than human c-Src or v-Abl. Phase 3.                                                                                                                |
| 134 | Flavopiridol (Alvocidib)             | CDK                    | 90 | Flavopiridol (Alvocidib) competes with ATP to inhibit CDKs including CDK1, CDK2, CDK4 and CDK6 with IC50 of ~ 40 nM. It is 7.5-fold more selective for CDK1, 2, 4, 6 versus CDK7. Flavopiridol is initially found to inhibit EGFR and PKA. Phase 1/2. |
| 135 | Almotriptan Malate                   | 5-HT Receptor          | 90 | Almotriptan Malate is a selective 5-hydroxytryptamine1B/1D (5-HT1B/1D) receptor agonist, used for the treatment of Migraine attacks in adults.                                                                                                        |

|     |                             |                          |    |                                                                                                                                                                                                                                                                                                        |
|-----|-----------------------------|--------------------------|----|--------------------------------------------------------------------------------------------------------------------------------------------------------------------------------------------------------------------------------------------------------------------------------------------------------|
| 136 | Proflavine Hemisulfate      | DNA/RNA Synthesis        | 90 | Blasticidin S HCl is a nucleoside antibiotic isolated from <i>Streptomyces girseochromogenes</i> , and acts as a DNA and protein synthesis inhibitor, used to select transfected cells carrying bsr or BSD resistance genes.                                                                           |
| 137 | Blasticidin S HCl           | DNA/RNA Synthesis        | 90 | Bivalirudin Trifluoroacetate is a synthetic 20 residue peptide (thrombin inhibitor) which reversibly inhibits thrombin.                                                                                                                                                                                |
| 138 | Cabozantinib malate (XL184) | VEGFR                    | 85 | Cabozantinib malate is the malate of Cabozantinib, a potent VEGFR2 inhibitor with IC50 of 0.035 nM and also inhibits c-Met, Ret, Kit, Flt-1/3/4, Tie2, and AXL with IC50 of 1.3 nM, 4 nM, 4.6 nM, 12 nM/11.3 nM/6 nM, 14.3 nM and 7 nM, respectively.                                                  |
| 139 | Irinotecan                  | Topoisomerase            | 85 | Irinotecan is a topoisomerase I inhibitor for LoVo cells and HT-29 cells with IC50 of 15.8 $\mu$ M and 5.17 $\mu$ M, respectively.                                                                                                                                                                     |
| 140 | S3I-201                     | STAT                     | 85 | S3I-201 shows potent inhibition of STAT3 DNA-binding activity with IC50 of 86 $\mu$ M, and low activity towards STAT1 and STAT5.                                                                                                                                                                       |
| 141 | Ibutilide Fumarate          | Sodium Channel           | 85 | Ibutilide Fumarate is a Class III antiarrhythmic agent that is indicated for acute cardioconversion of atrial fibrillation and atrial flutter of a recent onset to sinus rhythm by induction of slow inward sodium current, which prolongs action potential and refractory period of myocardial cells. |
| 142 | Tanshinone I                | Phospholipase (e.g. PLA) | 85 | Tanshinone I, an active principle isolated from <i>Salvia miltiorrhiza</i> (Danshen), is structurally similar to tanshinone IIA and may possess similar cytotoxic effects on tumor cells.                                                                                                              |
| 143 | BX-795                      | PDK-1, IKK               | 85 | BX795 is a potent and specific PDK1 inhibitor with IC50 of 6 nM, 140- and 1600-fold more selective for PDK1 than PKA and PKC, respectively. Meanwhile, in comparison to GSK3 $\beta$ more than 100-fold selectivity observed for PDK1.                                                                 |
| 144 | BX-912                      | PDK-1                    | 85 | BX912 is a potent and specific PDK1 inhibitor with IC50 of 12 nM, 9- and 105- fold greater selectivity for PDK1 than PKA and PKC, respectively. In comparison to GSK3 $\beta$ , selectivity for PDK1 is 600-fold.                                                                                      |
| 145 | Imatinib Mesylate (STI571)  | PDGFR, c-Kit, Bcr-Abl    | 85 | Imatinib Mesylate (STI571) is an orally bioavailability mesylate salt of Imatinib, which is a multi-target inhibitor of v-Abl, c-Kit and PDGFR with IC50 of 0.6 $\mu$ M, 0.1 $\mu$ M and 0.1 $\mu$ M, respectively.                                                                                    |
| 146 | NMS-873                     | p97                      | 85 | NMS-873 is an allosteric and specific p97 inhibitor with IC50 of 30 nM.                                                                                                                                                                                                                                |
| 147 | JNJ-26854165 (Serdemetan)   | p53                      | 85 | JNJ-26854165 acts as a HDM2 ubiquitin ligase antagonist and also induces early apoptosis in p53 wild-type cells, inhibits cellular proliferation followed by delayed apoptosis in the absence of functional p53. Phase 1.                                                                              |
| 148 | Chlorquinaldol              | Others                   | 85 | Chlorquinaldol is an antimicrobial agent used for local antiseptic.                                                                                                                                                                                                                                    |

|     |                       |                             |    |                                                                                                                                                                                                                                                         |
|-----|-----------------------|-----------------------------|----|---------------------------------------------------------------------------------------------------------------------------------------------------------------------------------------------------------------------------------------------------------|
| 149 | Cephalomannine        | Others                      | 85 | Cephalomannine is an active anti-cancer agent obtained from <i>Taxus yunnanensis</i> and has an antineoplastic effect on tumors found in mice.                                                                                                          |
| 150 | Benzethonium Chloride | Others                      | 85 | Benzethonium chloride is a potent inhibitor of nAChRs, it inhibits $\alpha 4\beta 2$ nAChRs and $\alpha 7$ nAChRs with IC <sub>50</sub> of 49 nM and 122 nM, respectively.                                                                              |
| 151 | Penfluridol           | Others                      | 85 | Penfluridol is a highly potent, first generation diphenylbutylpiperidine antipsychotic.                                                                                                                                                                 |
| 152 | Xylose                | Others                      | 85 | Xylose is a sugar first isolated from wood.                                                                                                                                                                                                             |
| 153 | Sertaconazole nitrate | Others                      | 85 | Sertaconazole nitrate is a topical broad-spectrum antifungal that is developed to provide an additional agent for the treatment of superficial cutaneous and mucosal infections.                                                                        |
| 154 | Mometasone furoate    | Others                      | 85 | Mometasone furoate is a glucocorticosteroid used topically to reduce inflammation of the skin or in the airways.                                                                                                                                        |
| 155 | (+)-MK 801 maleate    | NMDAR                       | 85 | (+)-MK-801 is a potent, selective and non-competitive NMDA receptor antagonist with K <sub>d</sub> of 37.2 nM in rat brain membranes                                                                                                                    |
| 156 | ABT-751 (E7010)       | Microtubule Associated      | 85 | ABT-751 (E7010) binds to the colchicine site on $\beta$ -tubulin and inhibits polymerization of microtubules, not a substrate for the MDR transporter and is active against cell lines resistant to vincristine, doxorubicin, and cisplatin. Phase 1/2. |
| 157 | AZD8330               | MEK                         | 85 | AZD8330 is a novel, selective, non-ATP competitive MEK 1/2 inhibitor with IC <sub>50</sub> of 7 nM. Phase 1.                                                                                                                                            |
| 158 | AZD1480               | JAK                         | 85 | AZD1480 is a novel ATP-competitive JAK2 inhibitor with IC <sub>50</sub> of 0.26 nM, selectivity against JAK3 and Tyk2, and to a smaller extent against JAK1. Phase 1.                                                                                   |
| 159 | AZ 960                | JAK                         | 85 | AZ 960 is a novel ATP competitive JAK2 inhibitor with IC <sub>50</sub> and K <sub>i</sub> of <3 nM and 0.45 nM, 3-fold selectivity of AZ960 for JAK2 over JAK3.                                                                                         |
| 160 | Rosuvastatin Calcium  | HMG-CoA Reductase           | 85 | Rosuvastatin Calcium is a competitive inhibitor of HMG-CoA reductase with IC <sub>50</sub> of 11 nM.                                                                                                                                                    |
| 161 | Fluvastatin Sodium    | HMG-CoA Reductase           | 85 | Fluvastatin Sodium inhibits HMG-CoA reductase activity with IC <sub>50</sub> of 8 nM.                                                                                                                                                                   |
| 162 | Atorvastatin Calcium  | HMG-CoA Reductase           | 85 | Atorvastatin (Lipitor) is an inhibitor of HMG-CoA reductase used as a cholesterol-lowering medication that blocks the production of cholesterol.                                                                                                        |
| 163 | Taladegib (LY2940680) | Hedgehog, Hedgehog/Smoothed | 85 | Taladegib (LY2940680) binds to the Smoothed (Smo) receptor and potently inhibits Hedgehog (Hh) signaling. Phase 1/2.                                                                                                                                    |
| 164 | KW-2449               | Flt, Bcr-Abl, Aurora Kinase | 85 | KW-2449 is a multiple-targeted inhibitor, mostly for Flt3 with IC <sub>50</sub> of 6.6 nM, modestly potent to FGFR1, Bcr-Abl and Aurora A; little effect on PDGFR $\beta$ , IGF-1R, EGFR. Phase 1.                                                      |
| 165 | PF-00562271           | FAK                         | 85 | PF-00562271 is the benzenesulfonate salt of PF-562271, which is a potent, ATP-competitive, reversible inhibitor of FAK                                                                                                                                  |

|     |                           |                                   |    |                                                                                                                                                                                                                                                                                           |
|-----|---------------------------|-----------------------------------|----|-------------------------------------------------------------------------------------------------------------------------------------------------------------------------------------------------------------------------------------------------------------------------------------------|
|     |                           |                                   |    | with IC50 of 1.5 nM, ~10-fold less potent for Pyk2 than FAK and >100-fold selectivity against other protein kinases, except for some CDKs. Phase 1.                                                                                                                                       |
| 166 | Levosulpiride             | Dopamine Receptor                 | 85 | Levosulpiride is a selective antagonist for D2 dopamine receptors used as an antipsychotic and prokinetic agent.                                                                                                                                                                          |
| 167 | Raltitrexed               | DNA/RNA Synthesis                 | 85 | Raltitrexed is a thymidylate synthase inhibitor with an IC50 of 9 nM for the inhibition of L1210 cell growth.                                                                                                                                                                             |
| 168 | PHA-767491                | CDK                               | 85 | PHA-767491 is a potent ATP-competitive dual Cdc7/CDK9 inhibitor with IC50 of 10 nM and 34 nM in cell-free assays, respectively. It displays ~20-fold selectivity against CDK1/2 and GSK3- $\beta$ , 50-fold selectivity against MK2 and CDK5, 100-fold selectivity against PLK1 and CHK2. |
| 169 | Vincristine sulfate       | Autophagy, Microtubule Associated | 85 | Vincristine is an inhibitor of polymerization of microtubules by binding to tubulin with IC50 of 32 $\mu$ M.                                                                                                                                                                              |
| 170 | SNS-314 Mesylate          | Aurora Kinase                     | 85 | SNS-314 Mesylate is a potent and selective inhibitor of Aurora A, Aurora B and Aurora C with IC50 of 9 nM, 31 nM, and 3 nM, respectively. It is less potent to Trk A/B, Flt4, Fms, Axl, c-Raf and DDR2. Phase 1.                                                                          |
| 171 | 5-Iodotubercidin          | adenosine receptor                | 85 | 5-Iodotubercidin is a potent adenosine kinase inhibitor with IC50 of 26 nM. It inhibits nucleoside transporter, CK1, insulin receptor tyrosine kinase, phosphorylase kinase, PKA, CK2 and PKC.                                                                                            |
| 172 | Perifosine (KRX-0401)     | Others                            | 85 | Sodium Monofluorophosphate is a competitive inhibitor of pyruvate kinase and alkaline phosphatase with Ki of 3.4 mM and 69 $\mu$ M, respectively, which also irreversibly inhibits phosphorylase phosphatase with Ki of 0.5 mM.                                                           |
| 173 | RO4929097                 | Y-Secretase                       | 80 | RO4929097 is a $\gamma$ secretase inhibitor with IC50 of 4 nM, inhibiting cellular processing of A $\beta$ 40 and Notch with EC50 of 14 nM and 5 nM, respectively. Phase 2.                                                                                                               |
| 174 | Telatinib                 | VEGFR, PDGFR, c-Kit               | 80 | Telatinib is a potent inhibitor of VEGFR2/3, c-Kit and PDGFR $\beta$ with IC50 of 6 nM/4 nM, 1 nM and 15 nM, respectively. Phase 2.                                                                                                                                                       |
| 175 | Topotecan HCl             | Topoisomerase                     | 80 | Topotecan (NSC 609699) is a topoisomerase I inhibitor for MCF-7 Luc cells and DU-145 Luc cells with IC50 of 13 nM and 2 nM, respectively.                                                                                                                                                 |
| 176 | Irinotecan HCl Trihydrate | Topoisomerase                     | 80 | Irinotecan prevents DNA from unwinding by inhibition of topoisomerase 1.                                                                                                                                                                                                                  |
| 177 | Stattic                   | STAT                              | 80 | Stattic, the first nonpeptidic small molecule, potently inhibits STAT3 activation and nuclear translocation with IC50 of 5.1 $\mu$ M, highly selectivity over STAT1.                                                                                                                      |
| 178 | PF-4708671                | S6 Kinase                         | 80 | PF-4708671 is a cell-permeable inhibitor of p70 ribosomal S6 kinase (S6K1 isoform) with Ki/IC50 of 20 nM/160 nM, 400-fold greater selectivity for S6K1 than S6K2, and 4- and >20-fold                                                                                                     |

|     |                       |                          |    |                                                                                                                                                                                                                                                                               |
|-----|-----------------------|--------------------------|----|-------------------------------------------------------------------------------------------------------------------------------------------------------------------------------------------------------------------------------------------------------------------------------|
|     |                       |                          |    | selectivity for S6K1 than MSK1 and RSK1/2, respectively. First S6K1-specific inhibitor to be reported.                                                                                                                                                                        |
| 179 | ML141                 | Rho                      | 80 | ML141 is a potent, selective and reversible non-competitive inhibitor of Rho family GTPase <b>cdc42</b> with <b>IC50</b> of 200 nM.                                                                                                                                           |
| 180 | UK 383367             | Procollagen C Proteinase | 80 | UK-383367 is a procollagen C-proteinase inhibitor with IC50 of 44 nM, has excellent selectivity over MMPs.                                                                                                                                                                    |
| 181 | Rosiglitazone HCl     | PPAR                     | 80 | Rosiglitazone HCl is a blood glucose-lowering drugs, stimulating insulin secretion by binding to the PPAR receptors in fat cells.                                                                                                                                             |
| 182 | Rigosertib (ON-01910) | PLK                      | 80 | Rigosertib (ON-01910) is a non-ATP-competitive inhibitor of PLK1 with IC50 of 9 nM. It shows 30-fold greater selectivity against Plk2 and no activity to Plk3. Phase 3.                                                                                                       |
| 183 | GSK461364             | PLK                      | 80 | GSK461364 inhibits purified Plk1 with Ki of 2.2 nM. It is more than 1000-fold selective against Plk2/3. Phase 1.                                                                                                                                                              |
| 184 | HMN-214               | PLK                      | 80 | HMN-214 is a prodrug of HMN-176, which alters the cellular spatial orientation of Plk1.                                                                                                                                                                                       |
| 185 | GSK2126458 (GSK458)   | PI3K, mTOR               | 80 | GSK2126458 is a highly selective and potent inhibitor of p110 $\alpha/\beta/\delta/\gamma$ , mTORC1/2 with Ki of 0.019 nM/0.13 nM/0.024 nM/0.06 nM and 0.18 nM/0.3 nM, respectively. Phase 1.                                                                                 |
| 186 | YM201636              | PI3K                     | 80 | YM201636 is a selective PIKfyve inhibitor with IC50 of 33 nM, less potent to p110 $\alpha$ and insensitive to FabI (yeast orthologue).                                                                                                                                        |
| 187 | GSK2606414            | PERK                     | 80 | GSK2606414 is an orally available, potent, and selective PERK inhibitor with IC50 of 0.4 nM, displaying at least 100-fold selectivity over the other EIF2AKs assayed.                                                                                                         |
| 188 | Roflumilast           | PDE                      | 80 | Roflumilast is a selective inhibitor of PDE4 with IC50 of 0.2-4.3 nM.                                                                                                                                                                                                         |
| 189 | A-966492              | PARP                     | 80 | A-966492 is a novel and potent inhibitor of <b>PARP1</b> and <b>PARP2</b> with <b>K<sub>i</sub></b> of 1 nM and 1.5 nM, respectively.                                                                                                                                         |
| 190 | Almorexant HCl        | OX Receptor              | 80 | Almorexant HCl is an orally active, dual orexin receptor antagonist with IC50 of 6.6 nM and 3.4 nM for OX1 and OX2 receptor, respectively. Phase 3.                                                                                                                           |
| 191 | Artesunate            | Others                   | 80 | Artesunate is a part of the artemisinin group of agents with an IC50 of < 5 $\mu$ M for small cell lung carcinoma cell line H69.                                                                                                                                              |
| 192 | Mebendazole           | others                   | 80 | Mebendazole is a synthetic benzimidazole derivate and anthelmintic agent. Mebendazole interferes with the reproduction and survival of helminths by inhibiting the formation of their cytoplasmic microtubules, thereby selectively and irreversibly blocking glucose uptake. |
| 193 | Modafinil             | others                   | 80 | Modafinil is a mood-brightening and memory-enhancing psychostimulant which enhances wakefulness and vigilance.                                                                                                                                                                |
| 194 | LY2886721             | Others                   | 80 | LY2886721 is an BACE inhibitor used for the treatment of                                                                                                                                                                                                                      |

|     |                               |                        |    |                                                                                                                                                                                                                                  |
|-----|-------------------------------|------------------------|----|----------------------------------------------------------------------------------------------------------------------------------------------------------------------------------------------------------------------------------|
| 195 | Nicardipine HCl               | Others                 | 80 | Alzheimer's Disease.<br>Nicardipine is a dihydropyridine calcium-channel blocking agent used for the treatment of vascular disorders.                                                                                            |
| 196 | Cepharanthine                 | Others                 | 80 | Cepharanthine is a biscochlorine alkaloid inhibiting tumor necrosis factor (TNF)- $\alpha$ -mediated NF $\kappa$ B stimulation, plasma membrane lipid peroxidation and platelet aggregation and suppressing cytokine production. |
| 197 | Albendazole                   | Others                 | 80 | Albendazole is a member of the benzimidazole compounds used as a drug indicated for the treatment of a variety of worm infestations.                                                                                             |
| 198 | Triclabendazole               | Others                 | 80 | Triclabendazole is a benzimidazole, it binds to tubulin impairing intracellular transport mechanisms and interferes with protein synthesis.                                                                                      |
| 199 | Sal003                        | Others                 | 80 | Sal003 is a potent and cell-permeable eIF-2 $\alpha$ phosphatase inhibitor.                                                                                                                                                      |
| 200 | Ambrisentan                   | Others                 | 80 | Ambrisentan, a highly selective antagonist of the endothelin-1 type A receptor with IC <sub>50</sub> of 18 nM, is indicated for the treatment of pulmonary arterial hypertension (PAH).                                          |
| 201 | ADL5859 HCl                   | Opioid Receptor        | 80 | ADL5859 HCl is a $\delta$ -opioid receptor agonist with K <sub>i</sub> of 0.8 nM, selectivity against opioid receptor $\kappa$ , $\mu$ , and weak inhibitory activity at the hERG channel. Phase 2.                              |
| 202 | Mestranol                     | NULL                   | 80 | Mestranol is the 3-methyl ether of ethinylestradiol. It was the estrogen used in many of the first oral contraceptives.                                                                                                          |
| 203 | Caffeic Acid Phenethyl Ester  | NF- $\kappa$ B         | 80 | Caffeic acid phenethyl ester is a potent and specific inhibitor of NF- $\kappa$ B activation, and also displays antioxidant, immunomodulatory and antiinflammatory activities.                                                   |
| 204 | Voxtalisib (XL765, SAR245409) | mTOR,PI3K              | 80 | Voxtalisib (SAR245409, XL765) is a dual inhibitor of mTOR/PI3K, mostly for p110 $\gamma$ with IC <sub>50</sub> of 9 nM; also inhibits DNA-PK and mTOR. Phase 1/2.                                                                |
| 205 | PP242                         | mTOR                   | 80 | PP242 is a selective mTOR inhibitor with IC <sub>50</sub> of 8 nM; targets both mTOR complexes with >10- and 100-fold selectivity for mTOR than PI3K $\delta$ or PI3K $\alpha/\beta/\gamma$ , respectively.                      |
| 206 | INK 128 (MLN0128)             | mTOR                   | 80 | INK 128 is a potent and selective mTOR inhibitor with IC <sub>50</sub> of 1 nM; >200-fold less potent to class I PI3K isoforms, superior in blocking mTORC1/2 and sensitive to pro-invasion genes (vs Rapamycin). Phase 1.       |
| 207 | Epothilone A                  | Microtubule Associated | 80 | Epothilone A is a Taxol-like microtubule-stabilizing agent with EC <sub>0.01</sub> of 2 $\mu$ M.                                                                                                                                 |
| 208 | Docetaxel                     | Microtubule Associated | 80 | Docetaxel, an analog of taxol, is an inhibitor of depolymerisation of microtubules by binding to stabilized microtubules.                                                                                                        |
| 209 | Pacritinib (SB1518)           | JAK                    | 80 | Pacritinib (SB1518) is a potent and selective inhibitor of Janus Kinase 2 (JAK2) and Fms-Like Tyrosine Kinase-3 (FLT3) with IC <sub>50</sub> s of 23 and 22 nM, respectively.                                                    |

|     |                                  |                             |    |                                                                                                                                                                                                      |
|-----|----------------------------------|-----------------------------|----|------------------------------------------------------------------------------------------------------------------------------------------------------------------------------------------------------|
| 210 | Tyrphostin AG 879                | HER2                        | 80 | Tyrphostin AG 879 potently inhibits HER2/ErbB2 with IC50 of 1 $\mu$ M, 100- and 500-fold higher selective to ErbB2 than PDGFR and EGFR.                                                              |
| 211 | Mubritinib (TAK 165)             | HER2                        | 80 | Mubritinib (TAK-165) is a potent inhibitor of HER2/ErbB2 with IC50 of 6 nM; no activity to EGFR, FGFR, PDGFR, JAK1, Src and Blk.                                                                     |
| 212 | CUDC-101                         | HDAC, EGFR, HER2            | 80 | CUDC-101 is a potent multi-targeted inhibitor against HDAC, EGFR and HER2 with IC50 of 4.4 nM, 2.4 nM, and 15.7 nM, and inhibits class I/II HDACs, but not class III, Sir-type HDACs. Phase 1.       |
| 213 | M344                             | HDAC                        | 80 | M344 is a potent HDAC inhibitor with IC50 of 100 nM and able to induce cell differentiation.                                                                                                         |
| 214 | SKF38393 HCl                     | Dopamine Receptor           | 80 | SKF38393 HCl is a selective <b>dopamine D1/D5 receptor</b> agonist.                                                                                                                                  |
| 215 | Floxuridine                      | DNA/RNA Synthesis           | 80 | Floxuridine is a prodrugs of floxuridine and an oncology agent with an GI50 of 5.1 $\mu$ M for the inhibition of MDCK/PEPT1.                                                                         |
| 216 | Fluorouracil (5-Fluoracil, 5-FU) | DNA/RNA Synthesis           | 80 | Fluorouracil (5-Fluoracil, 5-FU) is an DNA/RNA synthesis inhibitor, which interrupts nucleotide synthetic by inhibiting thymidylate synthase (TS).                                                   |
| 217 | Methotrexate                     | DHFR                        | 80 | Methotrexate is an antimetabolite and antifolate drug, which acts by inhibiting the metabolism of folic acid.                                                                                        |
| 218 | JNJ-38877605                     | c-Met                       | 80 | JNJ-38877605 is an ATP-competitive inhibitor of c-Met with IC50 of 4 nM, 600-fold selective for c-Met than 200 other tyrosine and serine-threonine kinases. Phase 1.                                 |
| 219 | AT7519 HCl                       | CDK                         | 80 | AT7519 HCl is a multi-<b>CDK</b> inhibitor for CDK1, 2, 4, 6 and 9 with <b>IC50</b> of 10-210 nM in cell-free assays. It is less potent to CDK3 and little active to CDK7. Phase 2.                  |
| 220 | Roscovitine (Seliciclib, CYC202) | CDK                         | 80 | Roscovitine (Seliciclib, CYC202) is a potent and selective CDK inhibitor for Cdc2, CDK2 and CDK5 with IC50 of 0.65 $\mu$ M, 0.7 $\mu$ M and 0.16 $\mu$ M. It shows little effect on CDK4/6. Phase 2. |
| 221 | IC261                            | Casein kinase               | 80 | IC261 is a novel inhibitor of CK1. The IC50 of IC261 for CK1 was 16 $\mu$ M and for Cdk5 is 4.5 mM.                                                                                                  |
| 222 | AT9283                           | Bcr-Abl, JAK, Aurora Kinase | 80 | AT9283 is a potent JAK2/3 inhibitor with IC50 of 1.2 nM/1.1 nM; also potent to Aurora A/B, Abl(T315I). Phase 1/2.                                                                                    |
| 223 | Barasertib (AZD1152-HQPA)        | Aurora Kinase               | 80 | AZD1152-HQPA (Barasertib) is a highly selective Aurora B inhibitor with IC50 of 0.37 nM, ~100 fold more selective for Aurora B over Aurora A.                                                        |
| 224 | Bisoprolol fumarate              | Adrenergic Receptor         | 80 | Bisoprolol fumarate is a selective type $\beta$ 1 adrenergic receptor blocker.                                                                                                                       |
| 225 | CGS 21680 HCl                    | 5-alpha Reductase           | 80 | CGS 21680 HCl is an adenosine A2 receptor agonist with IC50 of 22 nM, exhibits 140-fold over A1 receptor.                                                                                            |
| 226 | SB505124                         | TGF-beta/Smad               | 75 | SB505124 is a selective inhibitor of TGF $\beta$ R for ALK4, ALK5 with IC50 of 129 nM and 47 nM, respectively, also inhibits                                                                         |

|     |                                 |            |    |                                                                                                                                                                                                            |
|-----|---------------------------------|------------|----|------------------------------------------------------------------------------------------------------------------------------------------------------------------------------------------------------------|
|     |                                 |            |    | ALK7, but does not inhibit ALK1, 2, 3, or 6.                                                                                                                                                               |
| 227 | Dasatinib Monohydrate           | Src        | 75 | Dasatinib Monohydrate is a novel, potent and multi-targeted inhibitor that targets <b>Abl</b> , <b>Src</b> and c-Kit, with <b>IC50</b> of <1 nM, 0.8 nM and 79 nM, respectively.                           |
| 228 | SRT1720                         | Sirtuin    | 75 | SRT1720 is a selective SIRT1 activator with EC50 of 0.16 μM, but is >230-fold less potent for SIRT2 and SIRT3.                                                                                             |
| 229 | RAF265 (CHIR-265)               | Raf, VEGFR | 75 | RAF265 (CHIR-265) is a potent selective inhibitor of C-Raf/B-Raf with IC50 of 3-60 nM, and exhibits potent inhibition on VEGFR2 phosphorylation with EC50 of 30 nM. Phase 2.                               |
| 230 | Imidapril HCl                   | RAAS       | 75 | Imidapril HCl is a angiotensin-converting enzyme (ACE) inhibitor with IC50 of 2.6 nM, used for the treatment of hypertension.                                                                              |
| 231 | BKM120 (NVP-BKM120, Buparlisib) | PI3K       | 75 | BKM120 is a selective PI3K inhibitor of p110α/β/δ/γ with IC50 of 52 nM/166 nM/116 nM/262 nM, respectively. Reduced potency against VPS34, mTOR, DNAPK, with little activity to PI4Kβ. Phase 1/2.           |
| 232 | CP-673451                       | PDGFR      | 75 | CP 673451 is a selective inhibitor of PDGFRα/β with IC50 of 10 nM/1 nM, exhibits >450-fold selectivity over other angiogenic receptors, has antiangiogenic and antitumor activity.                         |
| 233 | S-(+)-Rolipram                  | PDE        | 75 | S-(+)-Rolipram inhibits human monocyte cyclic AMP-specific PDE4 with IC50 of 0.75 μM, has anti-inflammatory and anti-depressant activity in the central nervous system, less potent than its R enantiomer. |
| 234 | Dextrose                        | Others     | 75 | Dextrose, a simple sugar (monosaccharide), is an important carbohydrate in biology.                                                                                                                        |
| 235 | Mefloquine HCl                  | Others     | 75 | Mefloquine HCl is a blood schizonticide by inhibiting hemozoin formation, used as an antimalarial drug.                                                                                                    |
| 236 | PTC-209 HBr                     | Others     | 75 | PTC-209 HBr is the hydrobromide salt of PTC-209, which is a potent and selective BMI-1 inhibitor with IC50 of 0.5 μM, and results in irreversible reduction of cancer-initiating cells (CICs).             |
| 237 | Ascomycin (FK520)               | Others     | 75 | Ascomycin (FK520), an FK-506 analog, is a neutral macrolide <b>immunosuppressant</b> , which prevents rejection after an organ transplant. Phase 3.                                                        |
| 238 | Bexarotene                      | Others     | 75 | Bexarotene is a retinoid specifically selective for retinoid X receptors, used as an oral antineoplastic agent in the treatment of cutaneous T-cell lymphoma.                                              |
| 239 | Dronedaronone HCl               | Others     | 75 | Dronedaronone HCl is a therapy for the treatment of patients with paroxysmal and persistent atrial fibrillation or atrial flutter.                                                                         |
| 240 | Sulconazole Nitrate             | Others     | 75 | Sulconazole Nitrate is an imidazole derivative with broad-spectrum antifungal activity.                                                                                                                    |
| 241 | Arbidol HCl                     | Others     | 75 | Arbidol is an antiviral treatment for influenza infection.                                                                                                                                                 |
| 242 | Ciclesonide                     | others     | 75 | Ciclesonide is a glucocorticoid used to treat obstructive airway                                                                                                                                           |



|     |                      |                        |    |                                                                                                                                                                                                                                       |
|-----|----------------------|------------------------|----|---------------------------------------------------------------------------------------------------------------------------------------------------------------------------------------------------------------------------------------|
|     |                      |                        |    | diseases.                                                                                                                                                                                                                             |
| 243 | PA-824               | Others                 | 75 | PA-824 is an anti-tuberculosis drug for tuberculosis with MIC less than 2.8 $\mu$ M.                                                                                                                                                  |
| 244 | Naltrexone HCl       | Opioid Receptor        | 75 | Naltrexone is an opioid receptor antagonist with IC50 of 8 nM used primarily in the management of alcohol dependence and opioid dependence.                                                                                           |
| 245 | PF-04691502          | mTOR, PI3K, Akt        | 75 | PF-04691502 is an ATP-competitive PI3K( $\alpha/\beta/\delta/\gamma$ )/mTOR dual inhibitor with Ki of 1.8 nM/2.1 nM/1.6 nM/1.9 nM and 16 nM, little activity against either Vps34, AKT, PDK1, p70S6K, MEK, ERK, p38, or JNK. Phase 2. |
| 246 | Paclitaxel           | Microtubule Associated | 75 | Paclitaxel is a microtubule polymer stabilizer with IC50 of 0.1 $\mu$ M in human endothelial cells.                                                                                                                                   |
| 247 | PF-06447475          | LRRK2                  | 75 | PF-06447475 is a potent, selective, and brain penetrant LRRK2 kinase inhibitor with IC50 of 3 nM.                                                                                                                                     |
| 248 | WS3                  | I $\kappa$ B/IKK       | 75 | WS3 is a $\beta$ cell proliferation inducer via modulation of Erb3 binding protein-1 (EBP1) and the I $\kappa$ B kinase pathway.                                                                                                      |
| 249 | KW-2478              | HSP                    | 75 | KW-2478 is a nonansamycin HSP90 inhibitor with IC50 of 3.8 nM. Phase 1/2                                                                                                                                                              |
| 250 | Lovastatin           | HMG-CoA Reductase      | 75 | Lovastatin is an inhibitor of HMG-CoA reductase with IC50 of 3.4 nM, used for lowering cholesterol (hypolipidemic agent).                                                                                                             |
| 251 | Pracinostat (SB939)  | HDAC                   | 75 | SB939 is a potent pan-HDAC inhibitor with IC50 of 40-140 nM with exception for HDAC6. It has no activity against the class III isoenzyme SIRT I. Phase 2.                                                                             |
| 252 | LAQ824 (Dacinostat)  | HDAC                   | 75 | LAQ824 (Dacinostat) is a novel HDAC inhibitor with IC50 of 32 nM and is known to activate the p21 promoter.                                                                                                                           |
| 253 | TWS119               | GSK-3                  | 75 | TWS119 is a GSK-3 $\beta$ inhibitor with IC50 of 30 nM; capable of inducing neuronal differentiation and may be useful to stem cell biology.                                                                                          |
| 254 | Lapatinib            | EGFR, HER2             | 75 | Lapatinib, used in the form of Lapatinib Ditosylate, is a potent EGFR and ErbB2 inhibitor with IC50 of 10.8 and 9.2 nM, respectively.                                                                                                 |
| 255 | FT-207 (NSC 148958)  | DNA/RNA Synthesis      | 75 | FT-207 (NSC 148958) is a substance being used in the treatment of some types of cancer.                                                                                                                                               |
| 256 | Ifosfamide           | DNA/RNA Synthesis      | 75 | Ifosfamide is a nitrogen mustard alkylating agent used in the treatment of cancer.                                                                                                                                                    |
| 257 | Gossypol             | Dehydrogenase          | 75 | Gossypol is a polyphenolic aldehyde that permeates cells and acts as an inhibitor for several dehydrogenase enzymes.                                                                                                                  |
| 258 | Tivantinib (ARQ 197) | c-Met                  | 75 | Tivantinib (ARQ 197) is the first non-ATP-competitive c-Met inhibitor with $K_{i}$ of 0.355 $\mu$ M in a cell-free assay, little activity to Ron, and no inhibition to EGFR, InsR, PDGFR $\alpha$ or FGFR1/4. Phase 3.                |
| 259 | SU9516               | CDK                    | 75 | SU 9516 is a 3-substituted indolinone CDK inhibitor                                                                                                                                                                                   |

|     |                                  |                                          |    |                                                                                                                                                                                                                                                                                                                                                                                                                       |
|-----|----------------------------------|------------------------------------------|----|-----------------------------------------------------------------------------------------------------------------------------------------------------------------------------------------------------------------------------------------------------------------------------------------------------------------------------------------------------------------------------------------------------------------------|
|     |                                  |                                          |    | with <b>IC<sub>50</sub></b> of 22 nM, 40 nM, and 200 nM for CDK2, CDK1, and CDK4, respectively.                                                                                                                                                                                                                                                                                                                       |
| 260 | Flubendazole                     | Autophagy                                | 75 | Flubendazole is an autophagy inducer by targeting Atg4B, used to treat internal parasite and worm infection.                                                                                                                                                                                                                                                                                                          |
| 261 | Danuserib (PHA-739358)           | Aurora Kinase, FGFR, Bcr-Abl, c-RET, Src | 75 | Danuserib (PHA-739358) is an Aurora kinase inhibitor for Aurora A/B/C with IC <sub>50</sub> of 13 nM/79 nM/61 nM, modestly potent to Abl, TrkA, c-RET and FGFR1, and less potent to Lck, VEGFR2/3, c-Kit, CDK2, etc. Phase 2.                                                                                                                                                                                         |
| 262 | PF-3716556                       | ATPase, Proton Pump                      | 75 | PF 3716556 is a potent and selective P-CAB (potassium-competitive acid blocker), with pIC <sub>50</sub> of 6.026 and 7.095 for the inhibition of porcine H <sup>+</sup> ,K <sup>+</sup> -ATPase activity in ion-leaky and ion-tight assay, respectively, inhibits gastric acid secretion, displays no activity at Na <sup>+</sup> ,K <sup>+</sup> -ATPase, used for the treatment of gastroesophageal reflux disease. |
| 263 | Spironolactone                   | Androgen Receptor                        | 75 | Spironolactone is a potent antagonist of the androgen receptor with IC <sub>50</sub> of 77 nM.                                                                                                                                                                                                                                                                                                                        |
| 264 | A-674563                         | Akt, CDK, PKA                            | 75 | A-674563 is an Akt1 inhibitor with K <sub>i</sub> of 11 nM, modest potent to PKA and >30-fold selective for Akt1 over PKC.                                                                                                                                                                                                                                                                                            |
| 265 | LY3023414                        | Akt                                      | 75 | LY3023414 is an oral ATP competitive inhibitor of the class I PI3K isoforms, mTOR and DNA-PK.                                                                                                                                                                                                                                                                                                                         |
| 266 | Naftopidil                       | Adrenergic Receptor                      | 75 | Naftopidil (Flivas) is a selective α <sub>1</sub> -adrenergic receptor antagonist or alpha blocker with a K <sub>i</sub> of 58.3 nM.                                                                                                                                                                                                                                                                                  |
| 267 | Cisatracurium Besylate           | Adrenergic Receptor                      | 75 | Cisatracurium Besylate is a nondepolarizing neuromuscular blocking agent, antagonizing the action of acetylcholine by inhibiting neuromuscular transmission.                                                                                                                                                                                                                                                          |
| 268 | Bortezomib (PS-341)              | 20S proteasome                           | 75 | Bortezomib (PS-341) is a potent 20S proteasome inhibitor with K <sub>i</sub> of 0. favorable selectivity towards tumor cells over normal cells.                                                                                                                                                                                                                                                                       |
| 269 | Gemcitabine HCl                  | DNA/RNA Synthesis                        | 75 | Mizoribine is an imidazole nucleoside, selectively inhibits inosine monophosphate synthetase and guanosine monophosphate synthetase.                                                                                                                                                                                                                                                                                  |
| 270 | SN-38                            | Topoisomerase                            | 70 | SN-38 is an active metabolite of CPT-11, inhibits DNA topoisomerase I, DNA synthesis and causes frequent DNA single-strand breaks.                                                                                                                                                                                                                                                                                    |
| 271 | Tie2 kinase inhibitor            | Tie-2                                    | 70 | Tie2 kinase inhibitor is an optimized compound of SB-203580, selective to Tie2 with IC <sub>50</sub> of 0.25 μM, 200-fold more potent than p38.                                                                                                                                                                                                                                                                       |
| 272 | Daunorubicin HCl                 | Telomerase                               | 70 | Daunorubicin HCl inhibits both DNA and RNA synthesis and inhibits DNA synthesis with K <sub>i</sub> of 0.02 μM.                                                                                                                                                                                                                                                                                                       |
| 273 | LDE225 (NVP-LDE225, Erismodegib) | Smoothened                               | 70 | LDE225 (NVP-LDE225) is a Smoothened (Smo) antagonist, inhibiting Hedgehog (Hh) signaling with IC <sub>50</sub> of 1.3 nM (mouse) and 2.5 nM (human), respectively. Phase 3.                                                                                                                                                                                                                                           |
| 274 | RKI-1447                         | ROCK                                     | 70 | RKI-1447 is a potent inhibitor of ROCK1 and ROCK2, with IC <sub>50</sub> of 14.5 nM and 6.2 nM, respectively, has anti-invasive                                                                                                                                                                                                                                                                                       |

|     |                              |        |    |                                                                                                                                                                                                                                                                                                    |
|-----|------------------------------|--------|----|----------------------------------------------------------------------------------------------------------------------------------------------------------------------------------------------------------------------------------------------------------------------------------------------------|
|     |                              |        |    | and antitumor activities.                                                                                                                                                                                                                                                                          |
| 275 | Temocapril HCl               | RAAS   | 70 | Temocapril HCl is the hydrochloride of Temocapril, which is a long-acting angiotensin-converting enzyme (ACE) inhibitor, used for the treatment of hypertension.                                                                                                                                   |
| 276 | PF-4989216                   | PI3K   | 70 | PF-4989216 is a potent and selective PI3K inhibitor with IC <sub>50</sub> of 2 nM, 142 nM, 65 nM, 1 nM, and 110 nM for p110 $\alpha$ , p110 $\beta$ , p110 $\gamma$ , p110 $\delta$ , and VPS34, respectively.                                                                                     |
| 277 | Crenolanib (CP-868596)       | PDGFR  | 70 | Crenolanib (CP-868596) is a potent and selective inhibitor of PDGFR $\alpha/\beta$ with K <sub>d</sub> of 2.1 nM/3.2 nM, also potently inhibits FLT3, sensitive to D842V mutation not V561D mutation, >100-fold more selective for PDGFR than c-Kit, VEGFR-2, TIE-2, FGFR-2, EGFR, erbB2, and Src. |
| 278 | Cilostazol                   | PDE    | 70 | Cilostazol is a potent cyclic nucleotide phosphodiesterase type 3 (PDE3) inhibitor with IC <sub>50</sub> of 0.2 $\mu$ M and inhibitor of adenosine uptake.                                                                                                                                         |
| 279 | AG-14361                     | PARP   | 70 | AG14361 is a potent inhibitor of PARP1 with K <sub>i</sub> of <5 nM. It is at least 1000-fold more potent than the benzamides.                                                                                                                                                                     |
| 280 | RITA (NSC 652287)            | p53    | 70 | RITA (NSC 652287) induces both DNA-protein and DNA-DNA cross-links with no detectable DNA single-strand breaks, and also inhibits MDM2-p53 interaction by targeting p53.                                                                                                                           |
| 281 | Atropine sulfate monohydrate | Others | 70 | Atropine sulfate monohydrate is a competitive muscarinic acetylcholine receptor antagonist with an IC <sub>50</sub> of 2.5 nM.                                                                                                                                                                     |
| 282 | Artemisinin                  | Others | 70 | Artemisinin is a drug used to treat multi-drug resistant strains of falciparum malaria.                                                                                                                                                                                                            |
| 283 | Conivaptan HCl               | Others | 70 | Conivaptan is a non-peptide inhibitor of antidiuretic hormone (vasopressin receptor antagonist).                                                                                                                                                                                                   |
| 284 | Fenbendazole                 | Others | 70 | Fenbendazole is a broad spectrum benzimidazole anthelmintic used against gastrointestinal parasites with an IC <sub>50</sub> of about 0.01 $\mu$ g/mL.                                                                                                                                             |
| 285 | Tanshinone IIA               | Others | 70 | Tanshinone IIA(Tanshinone B) is the most abundant diterpene quinone in Danshen, <i>Salviae miltiorrhizae Radix</i> , a widely prescribed traditional herbal medicine that is used to treat cardiovascular and inflammatory diseases.                                                               |
| 286 | Nitazoxanide                 | Others | 70 | Nitazoxanide is a synthetic nitrothiazolyl-salicylamide derivative and an antiprotozoal agent. (IC <sub>50</sub> for canine influenza virus ranges from 0.17 to 0.21 $\mu$ M)                                                                                                                      |
| 287 | Bendamustine HCl             | Others | 70 | Bendamustine HCL is a DNA-damaging agent with IC <sub>50</sub> of 50 $\mu$ M.                                                                                                                                                                                                                      |
| 288 | LY2608204                    | Others | 70 | LY2608204 activates glucokinase (GK) with EC <sub>50</sub> of 42 nM. Phase 2.                                                                                                                                                                                                                      |
| 289 | WYE-125132 (WYE-132)         | mTOR   | 70 | WYE-125132 is a highly potent, ATP-competitive mTOR inhibitor with IC <sub>50</sub> of 0.19 nM; highly selective for mTOR versus PI3Ks or PI3K-related kinases hSMG1 and ATR.                                                                                                                      |

|     |                                 |                   |    |                                                                                                                                                                                                            |
|-----|---------------------------------|-------------------|----|------------------------------------------------------------------------------------------------------------------------------------------------------------------------------------------------------------|
| 290 | Batimastat (BB-94)              | MMP               | 70 | Batimastat (BB-94) is a potent, broad spectrum matrix metalloprotease (MMP) inhibitor for MMP-1, MMP-2, MMP-9, MMP-7 and MMP-3 with IC50 of 3 nM, 4 nM, 4 nM, 6 nM and 20 nM, respectively.                |
| 291 | NSC 405020                      | MMP               | 70 | NSC 405020 is a noncatalytic inhibitor of MT1-MMP, directly interacts with PEX domain of MT1-MMP, affects PEX homodimerization but not catalytic activity of MT1-MMP.                                      |
| 292 | PD98059                         | MEK               | 70 | PD98059 is a non-ATP competitive MEK inhibitor with IC50 of 2 µM, specifically inhibits MEK-1-mediated activation of MAPK; does not directly inhibit ERK1 or ERK2.                                         |
| 293 | MEK162 (ARRY-162, ARRY-43816 2) | MEK               | 70 | ARRY-438162 is a potent inhibitor of MEK1/2 with IC50 of 12 nM.                                                                                                                                            |
| 294 | Rasagiline Mesylate             | MAO               | 70 | Rasagiline Mesylate is a new MAO-B inhibitor for the treatment of idiopathic Parkinson's disease.                                                                                                          |
| 295 | CH5138303                       | HSP (e.g. HSP90)  | 70 | CH5138303 is an orally available Hsp90 inhibitor with Kd of 0.48 nM.                                                                                                                                       |
| 296 | PF-04929113 (SNX-5422)          | HSP               | 70 | PF-04929113 (SNX-5422) is a potent and selective HSP90 inhibitor with Kd of 41 nM and induces Her-2 degradation with IC50 of 37 nM. Phase 1/2.                                                             |
| 297 | 2-Methoxyestradiol (2-MeOE2)    | HIF               | 70 | 2-Methoxyestradiol depolymerizes microtubules and blocks HIF-1α nuclear accumulation and HIF-transcriptional activity. Phase 2.                                                                            |
| 298 | GW9508                          | GPR               | 70 | GW9508 is a potent and selective agonist for FFA1 (GPR40) with pEC50 of 7.32, 100-fold selective against GPR120, stimulates insulin secretion in a glucose-sensitive manner.                               |
| 299 | Dacarbazine                     | DNA/RNA Synthesis | 70 | Dacarbazine is an antineoplastic chemotherapy drug used in the treatment of various cancers.                                                                                                               |
| 300 | Aloxistatin                     | Cysteine Protease | 70 | Aloxistatin is an irreversible and membrane-permeable cysteine protease inhibitor.                                                                                                                         |
| 301 | ON123300                        | CDK               | 70 | ON123300 is a potent and multi-targeted kinase inhibitor with IC50 of 3.9 nM, 5 nM, 26 nM, 26 nM, 9.2 nM and 11nM for CDK4, Ark5, PDGFRβ, FGFR1, RET, and Fyn, respectively.                               |
| 302 | Odanacatib (MK-0822)            | Cathepsin K       | 70 | Odanacatib (MK 0822) is a potent, selective, and neutral inhibitor of cathepsin K (human/rabbit) with IC50 of 0.2 nM/1 nM, and demonstrated high selectivity versus off-target cathepsin B, L, S. Phase 3. |
| 303 | Azelnidipine                    | Calcium Channel   | 70 | Azelnidipine is a dihydropyridine calcium channel blocker.                                                                                                                                                 |
| 304 | TAK-901                         | Aurora Kinase     | 70 | TAK-901 is a novel inhibitor of Aurora A/B with IC50 of 21 nM/15 nM. It is not a potent inhibitor of cellular JAK2, c-Src or Abl. Phase 1.                                                                 |

---

|     |            |                    |    |                                                                                                     |
|-----|------------|--------------------|----|-----------------------------------------------------------------------------------------------------|
| 305 | Formestane | Aromatase          | 70 | Formestane(Lentaron(R)) is a second generation selective aromatase inhibitor with an IC50 of 80 nM. |
| 306 | Silodosin  | Adrenergic Recepto | 70 | Silodosin(Rapaflo) is an $\alpha$ 1-adrenoceptor antagonist with high uroselectivity.               |

---

**Table S2.** Preliminary screening bioactive compounds that facilitate ZIKV infection in SNB-19 cells

| No. | Name                     | Target                        | Fold change | Brief introduction                                                                                                                                                                                                                                 |
|-----|--------------------------|-------------------------------|-------------|----------------------------------------------------------------------------------------------------------------------------------------------------------------------------------------------------------------------------------------------------|
| 1   | URMC-099                 | MLK3                          | 2.9         | URMC-099 is an orally bioavailable, brain penetrant mixed lineage kinase (MLK) inhibitor with $IC_{50}$ of 19 nM, 42 nM, 14 nM, and 150 nM, for MLK1, MLK2, MLK3, and DLK, respectively, and also inhibits LRRK2 activity with $IC_{50}$ of 11 nM. |
| 2   | BV-6                     | PLK                           | 2.8         | BV-6 is a SMAC mimetic, dual cIAP and XIAP inhibitor.                                                                                                                                                                                              |
| 3   | LDK378                   | IAP                           | 2.8         | LDK378 is potent inhibitor against ALK with $IC_{50}$ of 0.2 nM, shows 40- and 35-fold selectivity against IGF-1R and InsR, respectively. Phase 2.                                                                                                 |
| 4   | BI2536                   | ALK                           | 2.8         | BI2536 is a potent Plk1 inhibitor with $IC_{50}$ of 0.83 nM. It shows 4- and 11-fold greater selectivity against Plk2 and Plk3. Phase 2.                                                                                                           |
| 5   | BMS-833923               | Hedgehog/Smoothened           | 2.3         | BMS-833923 is an orally bioavailable Smoothened antagonist. Phase 2.                                                                                                                                                                               |
| 6   | GSK503                   | Histone Methyltransferase     | 2.3         | GSK503 is a potent and specific EZH2 methyltransferase inhibitor.                                                                                                                                                                                  |
| 7   | LDN-214117               | TGF-beta/Smad                 | 2.1         | LDN-214117 is a potent and selective BMP type I receptor kinase ALK2 inhibitor with $IC_{50}$ of 24 nM.                                                                                                                                            |
| 8   | DDR1-IN-1                | DDR(receptor tyrosine kinase) | 2.1         | DDR1-IN-1 is a potent and selective discoidin domain receptor 1 (DDR1) receptor tyrosine kinase inhibitor with $IC_{50}$ of 105 nM, about 3-fold selectivity over DDR2.                                                                            |
| 9   | KC7F2                    | HIF                           | 2.0         | KC7F2 is a selective HIF-1 $\alpha$ transcription inhibitor with $IC_{50}$ of 20 $\mu$ M in a cell-based assay.                                                                                                                                    |
| 10  | Ruxolitinib (INCB018424) | JAK                           | 2.0         | INCB018424 is the first potent, selective, JAK1/2 inhibitor to enter the clinic with $IC_{50}$ of 3.3 nM/2.8 nM, >130-fold selectivity for JAK1/2 versus JAK3. Phase 3.                                                                            |
| 11  | Radotinib                | Bcr-Abl                       | 2.0         | Radotinib is a selective BCR-ABL1 tyrosine kinase inhibitor with $IC_{50}$ of 34 nM, used to treat Chronic Myeloid Leukemia.                                                                                                                       |
| 12  | EUK 134                  | Beta Amyloid                  | 2.0         | EUK 134, a synthetic superoxide dismutase (SOD)/catalase mimetic, exhibits potent antioxidant activities, and inhibits the formation of $\beta$ -amyloid and related amyloid fibril.                                                               |
| 13  | WZ4003                   | AMPK                          | 1.9         | WZ4003 is a highly specific NUAKE kinase inhibitor with $IC_{50}$ of 20 nM and 100 nM for NUAKE1 and NUAKE2, respectively, without significant inhibition on 139 other kinases.                                                                    |
| 14  | LY2119620                | AChR                          | 1.9         | LY2119620 is a specific, and allosteric agonist of human M2 and M4 muscarinic acetylcholine receptors.                                                                                                                                             |
| 15  | Belinostat (PXD101)      | HDAC                          | 1.9         | Belinostat (PXD101) is a novel HDAC inhibitor with $IC_{50}$ of 27 nM, with activity demonstrated in cisplatin-resistant tumors. Phase 1/2.                                                                                                        |

|    |                                            |                                   |     |                                                                                                                                                                                                                 |
|----|--------------------------------------------|-----------------------------------|-----|-----------------------------------------------------------------------------------------------------------------------------------------------------------------------------------------------------------------|
| 16 | Fatostatin                                 | Estrogen/progesto<br>gen Receptor | 1.9 | 17-Hydroxyprogesterone (17-OHP) is an endogenous progestogen as well as chemical intermediate in the biosynthesis of other steroid hormones, including the corticosteroids and the androgens and the estrogens. |
| 17 | PD 151746                                  | Cysteine Protease                 | 1.9 | PD 151746 is a selective, cell-permeable calpain inhibitor with Ki of 0.26 $\mu$ M for $\mu$ -Calpain, about 20-fold selectivity over m-calpain.                                                                |
| 18 | MS436                                      | Epigenetic Reader<br>Domain       | 1.9 | MS436 is a selective <b>BET bromodomain</b> inhibitor with <b>K<sub>i</sub></b> of <0.085 $\mu$ M and 0.34 $\mu$ M for BRD4 (1) and BRD4 (2), respectively.                                                     |
| 19 | Palbociclib<br>(PD0332991<br>) Isethionate | CDK                               | 1.9 | Palbociclib (PD0332991) Isethionate is a highly selective inhibitor of CDK4/6 with IC50 of 11 nM/16 nM in cell-free assays. It shows no activity against CDK1/2/5, EGFR, FGFR, PDGFR, InsR, etc. Phase 3.       |
| 20 | Deltarasin                                 | PDE                               | 1.9 | Deltarasin is a small molecular inhibitor of KRAS-PDE $\delta$ interaction with Kd of 38 nM for binding to purified PDE $\delta$ .                                                                              |
| 21 | Olmutinib<br>(HM61713,<br>BI 1482694)      | EGFR                              | 1.9 | Olmutinib is a novel third-generation epidermal growth factor receptor (EGFR) mutation-specific tyrosine kinase inhibitor (TKI). Also a potent inhibitor of Bruton's tyrosine kinase.                           |
| 22 | NQDI-1                                     | Gamma-secretase                   | 1.9 | MK-0752 is a moderately potent $\gamma$ -secretase inhibitor, which reduces A $\beta$ 40 production with IC50 of 5 nM. Phase 1/2.                                                                               |
| 23 | Entrectinib<br>(RXDX-101)                  | Trk receptor                      | 1.8 | Entrectinib (RXDX-101) is an orally bioavailable pan- <b>TrkA/B/C</b> , <b>ROS1</b> and <b>ALK</b> inhibitor with <b>IC50</b> ranging between 0.1 and 1.7 nM. Phase 2.                                          |
| 24 | Erlotinib                                  | EGFR                              | 1.8 | Erlotinib is an <b>EGFR</b> inhibitor with <b>IC50</b> of 2 nM, >1000-fold more sensitive for EGFR than human c-Src or v-Abl.                                                                                   |
| 25 | LTX-315                                    | Others                            | 1.8 | LTX-315 is the oncolytic peptide that kills cancer cells through Bax/Bak-regulated mitochondrial membrane permeabilization.                                                                                     |
| 26 | (+)-JQ1                                    | BET                               | 1.8 | (+)-JQ1 is a BET bromodomain inhibitor, with IC50 of 77 nM/33 nM for BRD4(1/2), binding to all bromodomains of the BET family, but not to bromodomains outside the BET family.                                  |
| 27 | 4-Hydroxyta<br>moxifen                     | Estrogen/progesto<br>gen Receptor | 1.7 | 4-Hydroxytamoxifen is the active metabolite of tamoxifen and a selective estrogen receptor (ER) modulator that is widely used in the therapeutic and chemopreventive treatment of breast cancer.                |
| 28 | Ponesimod                                  | S1P Receptor                      | 1.7 | Ponesimod(ACT-128800) is an orally active, selective sphingosine-1-phosphate receptor 1 (S1P1) immunomodulator with EC50 of 5.7 nM.                                                                             |
| 29 | Elesclomol<br>(STA-4783)                   | HSP                               | 1.7 | Elesclomol (STA-4783) is a novel potent oxidative stress inducer that elicits pro-apoptosis events among tumor cells.                                                                                           |
| 30 | Pimavanseri<br>n                           | 5-HT Receptor                     | 1.7 | Pimavanserin is a potent and selective serotonin 5-HT2A inverse agonist with pIC50 of 8.73, used to treat psychosis                                                                                             |

|    |                                         |                     |     |                                                                                                                                                                                                                                                                                                                                                          |
|----|-----------------------------------------|---------------------|-----|----------------------------------------------------------------------------------------------------------------------------------------------------------------------------------------------------------------------------------------------------------------------------------------------------------------------------------------------------------|
|    |                                         |                     |     | associated with Parkinson's disease.                                                                                                                                                                                                                                                                                                                     |
| 31 | Ozanimod (RPC1063)                      | S1P Receptor        | 1.7 | Ozanimod (RPC1063) is a selective oral S1P Receptor 1 modulator. Phase 3.                                                                                                                                                                                                                                                                                |
| 32 | ZSTK474                                 | PI3K                | 1.7 | ZSTK474 inhibits class I PI3K isoforms with IC50 of 37 nM, mostly PI3Kδ.                                                                                                                                                                                                                                                                                 |
| 33 | Citric acid trilitium salt tetrahydrate | others              | 1.6 | Citric acid trilitium salt tetrahydrate is a pharmaceutical and construction material. It is commonly used in HPLC gradient elution for quantification of amino acids.                                                                                                                                                                                   |
| 34 | Dovitinib (TKI258) Lactate              | FLT3                | 1.6 | Dovitinib (TKI258) Lactate is the Lactate of Dovitinib, which is a multitargeted RTK inhibitor, mostly for class III (<b>FLT3/c-Kit</b>) with <b>IC50</b> of 1 nM/2 nM, also potent to class IV (<b>FGFR1/3</b>) and class V (<b>VEGFR1-4</b>) RTKs with <b>IC50</b> of 8-13 nM, less potent to InsR, EGFR, c-Met, EphA2, Tie2, IGFR1 and HER2. Phase 4. |
| 35 | NSC59984                                | p53                 | 1.6 | NSC59984 is a p53 pathway activator via induction of mutant p53 protein degradation and p73 activation.                                                                                                                                                                                                                                                  |
| 36 | SL-327                                  | MEK                 | 1.6 | SL327 is a selective inhibitor for MEK1/2 with IC50 of 0.18 μM/0.22 μM, no activity towards Erk1, MKK3, MKK4, c-JUN, PKC, PKA, or CamKII; capable of transport through the blood-brain barrier.                                                                                                                                                          |
| 37 | SB216763                                | GSK-3               | 1.6 | SB216763 is a potent and selective GSK-3 inhibitor with IC50 of 34.3 nM for GSK-3α and equally effective at inhibiting human GSK-3β.                                                                                                                                                                                                                     |
| 38 | Dasatinib                               | Src, Bcr-Abl, c-Kit | 1.6 | Dasatinib is a novel, potent and multi-targeted inhibitor that targets Abl, Src and c-Kit, with IC50 of <1 nM, 0.8 nM and 79 nM, respectively.                                                                                                                                                                                                           |
| 39 | SB203580                                | p38 MAPK            | 1.6 | SB203580 is a p38 MAPK inhibitor with IC50 of 0.3-0.5 μM, 10-fold less sensitive to SAPK3(106T) and SAPK4(106T) and blocks PKB phosphorylation with IC50 of 3-5 μM.                                                                                                                                                                                      |
| 40 | Quizartinib (AC220)                     | Flt                 | 1.6 | Quizartinib (AC220) is a second-generation FLT3 inhibitor for Flt3(ITD/WT) with IC50 of 1.1 nM/4.2 nM, 10-fold more selective for Flt3 than KIT, PDGFRα, PDGFRβ, RET, and CSF-1R. Phase 1/2.                                                                                                                                                             |
| 41 | Filgotinib (GLPG0634)                   | JAK                 | 1.5 | Filgotinib (GLPG0634) is a selective JAK1 inhibitor with IC50 of 10 nM, 28 nM, 810 nM, and 116 nM for JAK1, JAK2, JAK3, and TYK2, respectively. Phase 2.                                                                                                                                                                                                 |
| 42 | Cobimetinib (GDC-0973, RG7420)          | MEK                 | 1.5 | Cobimetinib (GDC-0973, RG7420) is a potent and highly selective <b>MEK1</b> inhibitor with <b>IC50</b> of 4.2 nM. Phase 3.                                                                                                                                                                                                                               |
| 43 | Tranexamic Acid                         | Others              | 1.5 | Tranexamic Acid is an antifibrinolytic for blocking lysine-binding sites of plasmin and elastase-derived plasminogen fragments with IC50 of 5 mM.                                                                                                                                                                                                        |
| 44 | WZB117                                  | Others              | 1.5 | WZB117 is an inhibitor of Glucose Transporter 1 (GLUT1). It                                                                                                                                                                                                                                                                                              |



---

|    |                       |        |     |                                                                                                                                                                                                                                                                                            |
|----|-----------------------|--------|-----|--------------------------------------------------------------------------------------------------------------------------------------------------------------------------------------------------------------------------------------------------------------------------------------------|
| 45 | Iniparib<br>(BSI-201) | PARP   | 1.5 | <p>inhibited cell proliferation in lung cancer A549 cells and breast cancer MCF7 cells with an IC50 of approximately 10 <math>\mu</math>M.</p> <p>BSI-201 (Iniparib, SAR240550) is a PARP1 inhibitor with demonstrated effectiveness in triple-negative breast cancer (TNBC). Phase 3.</p> |
| 46 | Lomitapide            | others | 1.5 | <p>Lomitapide is a potent microsomal triglyceride transfer protein (MTP) inhibitor, used in the treatment of familial hypercholesterolemia.</p>                                                                                                                                            |
| 47 | Toremifene<br>Citrate | Others | 1.5 | <p>Toremifene Citrate is an oral selective estrogen receptor modulator (SERM) which helps oppose the actions of estrogen in the body.</p>                                                                                                                                                  |
| 48 | BS-181 HCl            | CDK    | 1.5 | <p>BS-181 is a highly selective CDK7 inhibitor with IC50 of 21 nM. It is more than 40-fold selective for CDK7 than CDK1, 2, 4, 5, 6, or 9.</p>                                                                                                                                             |
| 49 | L-Ornithine           | others | 1.5 | <p>L-ornithine has an antifatigue effect in increasing the efficiency of energy consumption and promoting the excretion of ammonia. It is one of the key reactants in the urea cycle.</p>                                                                                                  |

---
